# Supplementary material for: PNPLA3 Genotype, Arachidonic Acid Intake, and Unsaturated Fat Intake Influences Liver Fibrosis in Hispanic Youth with Obesity
Source: MDPI journal article supplement (doi:10.3390/nu13051621), 2021-05-12
Supplement: s1 [file s1]

**Table S1.** Liver fibrosis as a function of sex and *PNPLA3* genotype

|                          | <b>Model 1</b>          |                 | <b>Model 2</b>          |                 | <b>Model 3</b>          |                 | <b>Model 4</b>          |                 |
|--------------------------|-------------------------|-----------------|-------------------------|-----------------|-------------------------|-----------------|-------------------------|-----------------|
|                          | Effect                  | <i>p</i> -value |
|                          | Size                    |                 | Size                    |                 | Size                    |                 | Size                    |                 |
|                          | ( $\eta^2 \times 100$ ) |                 | ( $\eta^2 \times 100$ ) |                 | ( $\eta^2 \times 100$ ) |                 | ( $\eta^2 \times 100$ ) |                 |
| Sex                      | 8.39                    | <b>0.02</b>     | 7.64                    | <b>0.022</b>    | 1.26                    | 0.339           | 1.40                    | 0.316           |
| Genotype                 | 10.14                   | <b>0.008</b>    | 8.04                    | <b>0.019</b>    | 0.58                    | 0.515           | 0.72                    | 0.471           |
| Sex*Genotype Interaction |                         |                 |                         |                 | 3.77                    | 0.101           | 3.95                    | 0.096           |

Model 1: with no adjustments;

Model 2: adjusted for liver fat;

Model 3: includes the interaction between sex and *PNPLA3* genotype with no adjustments;

Model 4: includes the interaction between sex and *PNPLA3* genotype adjusted for liver fat

**Table S2.** Influence of dietary components on liver fibrosis in Hispanic adolescents with obesity and differential associations by *PNPLA3* genotype.

|                                    | Dietary influence on liver fibrosis* |                 | Dietary influence on liver fibrosis by <i>PNPLA3</i> genotype* |                         |                             |
|------------------------------------|--------------------------------------|-----------------|----------------------------------------------------------------|-------------------------|-----------------------------|
|                                    | $\beta$                              | <i>p</i> -value | $\beta_{GG}$                                                   | $\beta_{CC/CG}$         | Interaction <i>p</i> -value |
| Energy intake (kcal/day)           | 2.66x10 <sup>-6</sup>                | 0.96            | 1.86 x10 <sup>-4</sup>                                         | -1.22 x10 <sup>-4</sup> | <b>0.007</b>                |
| Fat (g/day)                        | 3.88x10 <sup>-3</sup>                | 0.22            | 6.78 x10 <sup>-3</sup>                                         | 1.88 x10 <sup>-4</sup>  | <b>0.01</b>                 |
| Protein (g/day)                    | 1.83x10 <sup>-3</sup>                | 0.35            | 4.59 x10 <sup>-3</sup>                                         | -1.57 x10 <sup>-3</sup> | 0.02                        |
| Carbohydrates (g/day)              | -1.53x10 <sup>-3</sup>               | 0.15            | -1.06 x10 <sup>-4</sup>                                        | -1.74 x10 <sup>-3</sup> | 0.048                       |
| Total sugars (g/day)               | -2.36x10 <sup>-4</sup>               | 0.86            | 1.32 x10 <sup>-3</sup>                                         | -1.68 x10 <sup>-3</sup> | 0.06                        |
| Added sugars (g/day)               | -1.44x10 <sup>-3</sup>               | 0.39            | 4.52 x10 <sup>-4</sup>                                         | -3.18 x10 <sup>-3</sup> | 0.06                        |
| Sucrose(g/day)                     | -2.62x10 <sup>-4</sup>               | 0.89            | 3.26 x10 <sup>-3</sup>                                         | -1.97 x10 <sup>-3</sup> | 0.09                        |
| Fiber (g/day)                      | -6.8x10 <sup>-4</sup>                | 0.92            | 1.14 x10 <sup>-2</sup>                                         | -5.18 x10 <sup>-3</sup> | 0.21                        |
| <b>Dietary Fatty Acids profile</b> |                                      |                 |                                                                |                         |                             |
| Saturated fatty acids (g/day)      | 4.18x10 <sup>-3</sup>                | 0.46            | 7.11 x10 <sup>-3</sup>                                         | -1.43 x10 <sup>-3</sup> | 0.26                        |
| Unsaturated fatty acids (g/day)    | 8.86x10 <sup>-3</sup>                | 0.08            | 1.5 x10 <sup>-2</sup>                                          | 2.91 x10 <sup>-3</sup>  | 0.02                        |
| MUFA (g/day)                       | 1.01x10 <sup>-2</sup>                | 0.17            | 2.12 x10 <sup>-2</sup>                                         | 1.52 x10 <sup>-3</sup>  | <b>0.01</b>                 |
| Oleic acid (g/day)                 | 1.01 x10 <sup>-2</sup>               | 0.20            | 2.24 x10 <sup>-2</sup>                                         | 1.26 x10 <sup>-3</sup>  | <b>0.01</b>                 |
| PUFA (g/day)                       | 1.04 x10 <sup>-2</sup>               | 0.20            | 2.13 x10 <sup>-2</sup>                                         | -4.12 x10 <sup>-3</sup> | <b>0.01</b>                 |
| Omega-3 fatty acids (g/day)        | 4.75 x10 <sup>-2</sup>               | 0.52            | 1.31 x10 <sup>-1</sup>                                         | -9.92 x10 <sup>-2</sup> | 0.02                        |
| EPA (g/day)                        | -1.19                                | 0.54            | 21.2                                                           | -3.34                   | <b>0.0002</b>               |
| DHA (g/day)                        | 0.61                                 | 0.34            | 4.19                                                           | -2.18 x10 <sup>-2</sup> | 0.02                        |
| Omega-6 fatty acids (g/day)        | 1.16x10 <sup>-2</sup>                | 0.19            | 2.48 x10 <sup>-2</sup>                                         | -3.73 x10 <sup>-3</sup> | <b>0.01</b>                 |
| Arachidonic acid (g/day)           | 0.95                                 | <b>0.03</b>     | 1.87                                                           | -0.22                   | 0.02                        |
| Linoleic acid (g/day)              | 1.14x10 <sup>-2</sup>                | 0.20            | 2.49 x10 <sup>-2</sup>                                         | -3.79 x10 <sup>-3</sup> | <b>0.01</b>                 |

\*Models adjust for age, gender and energy intake

MUFA, monounsaturated fatty acids; PUFA, polyunsaturated fatty acids; EPA, Eicosapentaenoic fatty acid; DHA, Docosahexaenoic fatty acid

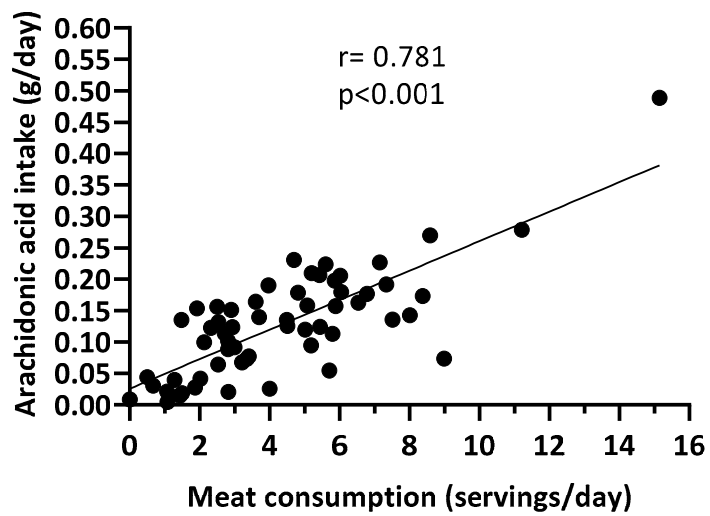

**Figure S1. Association between dietary arachidonic acid intake and meat consumption of participants in the study.** A linear model was used to determine the association between arachidonic acid intake (g/day) and meat consumption (servings/day). This model additionally adjusted for caloric intake.

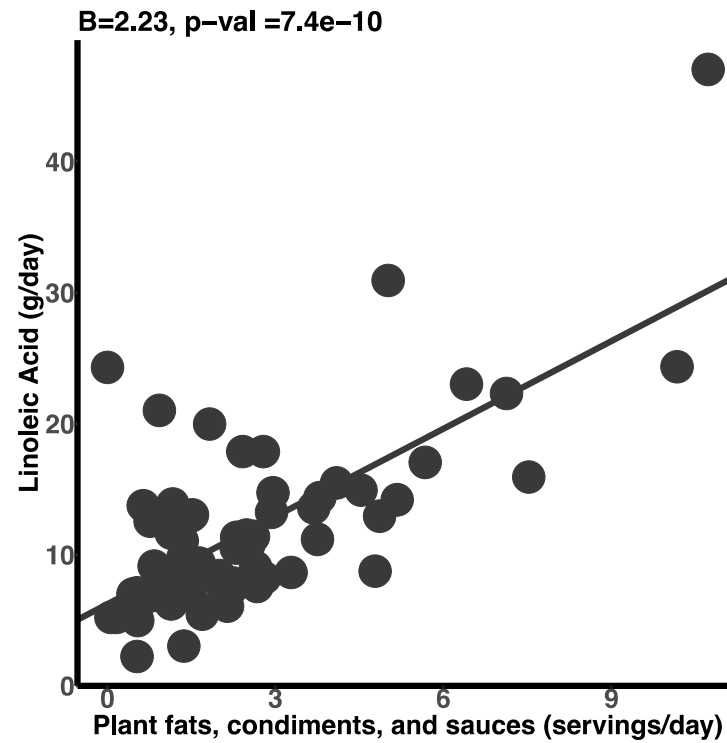

(a)

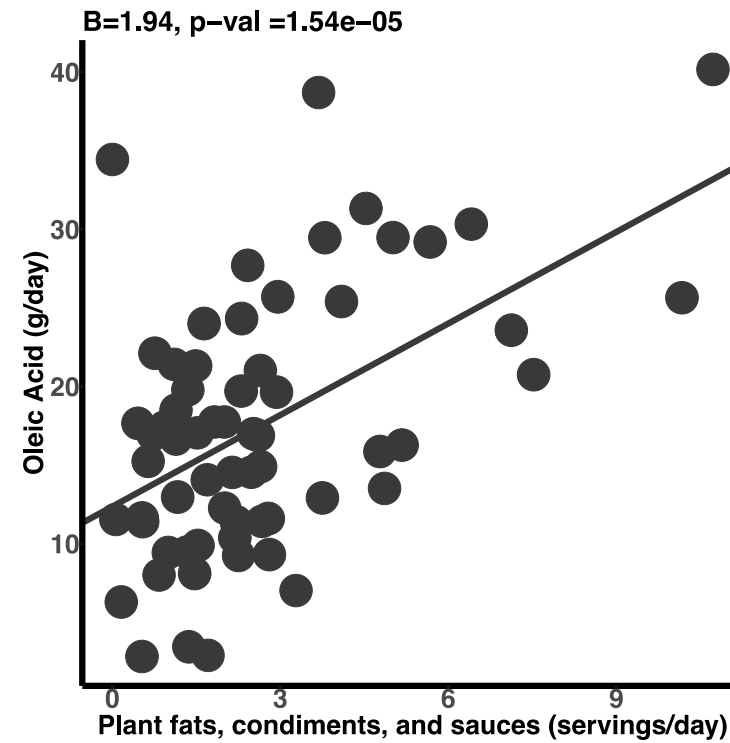

(b)

**Figure S2. Association between dietary linoleic acid and oleic acid intakes and total plant fats, condiments and sauces consumption of participants in the study.** A linear model was used to determine the association between (a) linoleic acid intake (g/day) or (b) oleic acid intake (g/day) and total plant fats, condiments and sauces consumption (servings/day).
